# Supplementary material
Source: PubMed Central journal article supplement (PMC5705192)

# THE LANCET

## Supplementary webappendix

This webappendix formed part of the original submission and has been peer reviewed. We post it as supplied by the authors.

Supplement to: Baselga J, Bradbury I, Eidtmann H, et al, on behalf of the NeoALTTO Study Team. Lapatinib with trastuzumab for HER2-positive early breast cancer (NeoALTTO): a randomised, open-label, multicentre, phase 3 trial. *Lancet* 2012; published online Jan 17. DOI:10.1016/S0140-6736(11)61847-3.

## **Supplementary Appendix** (Baselga et al. for the NeoALTTO Study Team)

### **Section 1: Neo-ALTTO Collaborative Group Participants (in alphabetic order)**

BrEAST (Breast European Adjuvant Studies Team); FNCLCC (Fédération Nationale des Centres de Lutte Contre le Cancer); GBECAM (Grupo Brasileiro de Estudos do Câncer de Mama); GBG (German Breast Group); GECO PERU (Grupo de Estudios Clínicos Oncológicos del Perú); German ALTTO (AGO BREAST (Arbeitsgemeinschaft Gynäkologische Onkologie); IBCSG (International Breast Cancer Study Group); KCSG (Korean Cancer Study Group) NBCG (Norsk Bryst Cancer Gruppe); NCIC-CTG (National Cancer Institute of Canada - Clinical Trials Group); NOGGO (Nord-Ostdeutsche Gesellschaft für Gynäkologische Onkologie); SOLTI (Solid Tumor Intensification); SUCCESS; TCOG (Taiwan Cooperative Oncology Group); WSG (West German Study Group) and Independent sites.

### **Section 2.: NeoALTTO Study design (Figure A1)**

Doses and schedules of pre-surgery lapatinib, trastuzumab and paclitaxel are described in the text. Post-surgery chemotherapy consisted of three 21-day cycles of FEC chemotherapy [5-fluorouracil (500 mg/m<sup>2</sup> given on day 1), epirubicin (100 mg/m<sup>2</sup> given on day 1) and cyclophosphamide (500 mg/m<sup>2</sup> given on day 1)]. Doses and schedules of anti-HER2 therapy administered for 34 weeks following chemotherapy were 1500 mg per day for lapatinib alone, a loading dose of 8 mg/kg infused over a 90 minute period with subsequent doses of 6 mg/kg infused over a 30 minute period every three weeks for trastuzumab alone, and the same schedule of trastuzumab as described above plus 1000 mg daily of lapatinib for the combination arm.

### **Section 3: Study Agents' Dose Modification Algorithms**

During the administration of lapatinib if non haematological grade 3-4 toxic effects occurred and it was deemed consistent with previously observed lapatinib adverse events, lapatinib could be withheld for a maximum of 14 days and until recovery to grade 1 or lower. In patients receiving paclitaxel and lapatinib in combination, if diarrhoea grade 3-4 occurred, supportive measures were implemented and both therapies were withheld until recovery to grade 2. If grade 2 toxicity persisted the dose of paclitaxel was reduced by 20% and if it persisted further, lapatinib (and paclitaxel if toxicity  $\geq 3$ ) administration was discontinued. In case of abnormal liver function, grade  $\geq 3$  ALT/AST or bilirubin, or grade 2 for both ALT and bilirubin, lapatinib was permanently discontinued. Lapatinib was also discontinued in cases with persistent grade 2 ALT or bilirubin and dose was reduced for patients with persistent grade 1 ALT /AST or bilirubin. The criteria for abnormal liver function were not applied to trastuzumab. If non haematological grade 3 or 4 toxic effects occurred, trastuzumab was temporarily held until recovery to grade 2 or lower. If non haematological grade 3 or 4 toxic effects occurred upon re-challenge, then trastuzumab was permanently discontinued.

Treatment with trastuzumab, lapatinib or both was to be permanently stopped if a patient developed severe symptomatic congestive heart failure and a drop in left ventricular ejection fraction (LVEF) of more than 10 points from baseline and to below 50% or in cases of a drop in LVEF of more than 10 points from baseline and to below 50, confirmed by a second LVEF assessment after holding treatment for approximately three weeks. An algorithm for discontinuation of lapatinib and/or trastuzumab based on interval LVEF assessments was implemented.

**Section 4:: Table A1. Characteristics of Cardiac Adverse Events, including Decreased Left Ventricular Ejection Fraction, occurring during Neoadjuvant Treatment**

|                                                               | Lapatinib<br>(N=154) | Trastuzumab<br>(N=149) | Lapatinib +<br>Trastuzumab<br>(N = 152) |
|---------------------------------------------------------------|----------------------|------------------------|-----------------------------------------|
| <b>Cardiac Adverse Events of Special Interest<sup>a</sup></b> |                      |                        |                                         |
| <b>Subjects with Events, n (%)</b>                            | 1 (0.6%)             | 2 (1.3%)               | 4 (2.6%)                                |
| <b>Number of Events</b>                                       | 1                    | 2                      | 4                                       |
| <b>Event Characteristics, n</b>                               |                      |                        |                                         |
| Serious                                                       | 0                    | 0                      | 0                                       |
| Considered to be treatment related                            | 1                    | 2                      | 3                                       |
| Leading to withdrawal of study medication                     | 0                    | 0                      | 0                                       |
| Fatal                                                         | 0                    | 0                      | 0                                       |
| <b>Maximum Severity, n (%)</b>                                |                      |                        |                                         |
| Grade 1                                                       | 1 (0.6%)             | 1 (0.7%)               | 2 (1.3%)                                |
| Grade 2                                                       | 0                    | 1 (0.7%)               | 1 (0.6%)                                |
| Grade 3                                                       | 0                    | 0                      | 0                                       |
| Grade 4                                                       | 0                    | 0                      | 0                                       |
| Grade 5                                                       | 0                    | 0                      | 0                                       |
| Missing                                                       | 0                    | 0                      | 1                                       |
| <b>Outcome, n</b>                                             |                      |                        |                                         |
| Recovered/resolved                                            | 1                    | 2                      | 2                                       |
| Recovering/resolving                                          | 0                    | 0                      | 0                                       |
| Recovered/resolved with sequelae                              | 0                    | 0                      | 1                                       |
| Not recovered/resolved                                        | 0                    | 0                      | 0                                       |
| Fatal                                                         | 0                    | 0                      | 0                                       |
| Missing                                                       | 0                    | 0                      | 1                                       |
| <b>Action Taken, n</b>                                        |                      |                        |                                         |
| Study treatment withdrawn                                     | 0                    | 0                      | 0                                       |
| Dose reduced                                                  | 1                    | 0                      | 0                                       |
| Dose not changed                                              | 0                    | 1                      | 1                                       |
| Dose delayed/interrupted                                      | 0                    | 1                      | 2                                       |
| Missing                                                       | 0                    | 0                      | 1                                       |
| <b>Time of Onset (Days since start of treatment)</b>          |                      |                        |                                         |
| Mean (standard deviation)                                     | 81.0 (-)             | 84.0 (59.4)            | 81.3 (40.3)                             |
| Median (range)                                                | 81 (-)               | 84 ( 42, 126)          | 77 (39, 133)                            |
| <b>Duration Days</b>                                          |                      |                        |                                         |
| Mean (standard deviation)                                     | 12.0 (-)             | 105.5 (67.2)           | 105.0 (152.6)                           |
| Median (range)                                                | 12 (-)               | 106 (58, 153)          | 25 (9, 281)                             |

| <b>Other Cardiac Adverse Events<sup>b</sup></b>      |               |              |              |
|------------------------------------------------------|---------------|--------------|--------------|
| <b>Subjects with Events, n (%)</b>                   | 8 (5.2%)      | 6 (4.0%)     | 8 (5.3%)     |
| <b>Number of Events</b>                              | 8             | 6            | 10           |
| <b>Event Characteristics, n</b>                      |               |              |              |
| Serious                                              | 0             | 0            | 0            |
| Considered to be treatment related                   | 5             | 4            | 6            |
| Leading to withdrawal of study medication            | 0             | 0            | 0            |
| Fatal                                                | 0             | 0            | 0            |
| <b>Maximum Severity, n (%)</b>                       |               |              |              |
| Grade 1                                              | 4 (2.6%)      | 4 (2.7%)     | 7 (4.6%)     |
| Grade 2                                              | 4 (2.6%)      | 2 (1.3%)     | 1 (0.7%)     |
| Grade 3                                              | 0             | 0            | 0            |
| Grade 4                                              | 0             | 0            | 0            |
| Grade 5                                              | 0             | 0            | 0            |
| Missing                                              | 0             | 0            | 0            |
| <b>Outcome, n</b>                                    |               |              |              |
| Recovered/resolved                                   | 7             | 5            | 8            |
| Recovering/resolving                                 | 0             | 0            | 0            |
| Recovered/resolved with sequelae                     | 0             | 0            | 0            |
| Not recovered/resolved                               | 0             | 0            | 0            |
| Fatal                                                | 0             | 0            | 0            |
| Missing                                              | 1             | 1            | 2            |
| <b>Action Taken, n</b>                               |               |              |              |
| Study treatment withdrawn                            | 0             | 0            | 0            |
| Dose reduced                                         | 0             | 0            | 0            |
| Dose not changed                                     | 7             | 5            | 10           |
| Dose delayed/interrupted                             | 0             | 1            | 0            |
| Missing                                              | 1             | 0            | 0            |
| <b>Time of Onset (Days since start of treatment)</b> |               |              |              |
| Mean (standard deviation)                            | 69.1 (48.3)   | 74.7 (62.6)  | 80.2 (15.4)  |
| Median (range)                                       | 64 ( 4, 140)) | 83 ( 1, 146) | 74 (60, 105) |
| <b>Duration Days</b>                                 |               |              |              |
| Mean (standard deviation)                            | 20.3 (24.4)   | 43.6 (61.9)  | 25.4 (35.4)  |
| Median (range)                                       | 8 (2, 64)     | 11 (1, 146)  | 11 (1, 96)   |

Notes:

- i) Percentages are of numbers in the arm. ITT population used.
- a) Includes Adverse Events with the following preferred terms: 'ejection fraction decreased', 'cardiac failure congestive', 'myocardial ischaemia'
- b) Includes all other Adverse Events with body system class 'cardiac disorders'

## **Section 5: Dose Reductions of Study Agents**

One-hundred and nine patients (70.8%) in the lapatinib-alone arm and 65 patients (42.8%) in the combination arm completed lapatinib without dose reductions. The majority of the remaining patients had one dose reduction (26 (16.9%) vs. 81 (53.3%) in lapatinib-alone and lapatinib plus trastuzumab, respectively). Eighty-six patients (55.8%) in the lapatinib-alone arm and 94 patients (61.8%) in the lapatinib plus trastuzumab arm experienced no delays in dosing with lapatinib.

There were no reductions in paclitaxel dose. Sixty-seven patients (43.5%) in the lapatinib-alone arm, 103 (69.1%) in the trastuzumab-alone arm, and 84 (55.3%) in the combination arm completed paclitaxel treatment without any dose delays. The majority of patients experienced only one delay: 47 (30.5%) in the lapatinib-alone arm, 29 (19.5%) in the trastuzumab-alone arm, and 35 (23.0%) in the combination arm. The median dose of paclitaxel received per patient (mg/m<sup>2</sup>) was 880 in the lapatinib arm, 960 in the trastuzumab-alone arm and 960 in the combination arm

Ninety-eight patients (65.8%) in the trastuzumab-alone arm and 90 (59.2%) in the combination arm completed trastuzumab dosing with no delays. Disease progression while on therapy resulted in treatment discontinuation for eight patients; three in the lapatinib-alone arm, four in the trastuzumab-alone arm, and one in the lapatinib plus trastuzumab arm. Of these eight patients, one in the lapatinib-alone arm received no paclitaxel, one each in the trastuzumab-alone and in the lapatinib plus trastuzumab arms received one dose of paclitaxel, and the remaining five patients received two or more doses of paclitaxel.



## Section 6: Pathological Complete Response (pCR) Rates for Subgroups

**Table A2: Proportion of Patients in ITT Population with Pathological Complete Response (pCR) at the Time of Surgery, Split by Clinical Lymph Node Status at Baseline**

| <b>Lymph Node status N0/1 at Baseline</b>     | <b>Lapatinib</b>       | <b>Trastuzumab</b> | <b>Lapatinib + Trastuzumab</b> |
|-----------------------------------------------|------------------------|--------------------|--------------------------------|
| Number of Patients [N]                        | 129                    | 126                | 128                            |
| Number of Patients with pCR [r]               | 31                     | 36                 | 64                             |
| Rate of pCR [r/N]                             | 24.03%                 | 28.57%             | 50.00%                         |
| Exact 95% CI for pCR Rate                     | (16.95%, 32.34%)       | (20.88%, 37.30%)   | (41.04%, 58.96%)               |
| Binomial p-value: comparisons vs.trastuzumab  | 0.4102                 |                    | 0.0005                         |
| Difference vs. trastuzumab and Exact 97.5% CI | -4.54% (-18.6%, 9.35%) |                    | 21.43% (7.67%, 35.01%)         |

  

| <b>Lymph Node status N2+, Nx or missing at Baseline</b> | <b>Lapatinib</b>        | <b>Trastuzumab</b> | <b>Lapatinib + Trastuzumab</b> |
|---------------------------------------------------------|-------------------------|--------------------|--------------------------------|
| Number of Patients [N]                                  | 25                      | 23                 | 24                             |
| Number of Patients with pCR [r]                         | 7                       | 8                  | 14                             |
| Rate of pCR [r/N]                                       | 28.00%                  | 34.78%             | 58.33%                         |
| Exact 95% CI for pCR Rate                               | (12.07%, 49.39%)        | (16.38%, 57.27%)   | (36.64%, 77.89%)               |
| Binomial p-value: comparisons vs. trastuzumab           | 0.6125                  |                    | 0.1058                         |
| Difference vs.trastuzumab and Exact 97.5% CI            | -6.78% (-37.3%, 25.72%) |                    | 23.55% (-9.98%, 53.86%)        |



**Table A3: Proportion of Patients in ITT Population with Pathological Complete Response (pCR) at the Time of Surgery, Split by Surgery Planned at Baseline**

| <b>Non-conservative surgery planned (or non-operable) at baseline</b> | <b>Lapatinib</b>        | <b>Trastuzumab</b> | <b>Lapatinib + Trastuzumab</b> |
|-----------------------------------------------------------------------|-------------------------|--------------------|--------------------------------|
| Number of Patients [N]                                                | 107                     | 112                | 106                            |
| Number of Patients with pCR [r]                                       | 28                      | 33                 | 52                             |
| Rate of pCR [r/N]                                                     | 26.17%                  | 29.46%             | 49.06%                         |
| Exact 95% CI for pCR Rate                                             | (18.15%, 35.55%)        | (21.23%, 38.82%)   | (39.22%, 58.95%)               |
| Binomial p-value: comparisons vs. trastuzumab                         | 0.5865                  |                    | 0.0030                         |
| Difference vs. trastuzumab and Exact 97.5% CI                         | -3.30% (-18.4%, 11.89%) |                    | 19.59% (4.43%, 34.17%)         |
| <b>Conservative surgery planned at baseline</b>                       | <b>Lapatinib</b>        | <b>Trastuzumab</b> | <b>Lapatinib + Trastuzumab</b> |
| Number of Patients [N]                                                | 47                      | 37                 | 46                             |
| Number of Patients with pCR [r]                                       | 10                      | 11                 | 26                             |
| Rate of pCR [r/N]                                                     | 21.28%                  | 29.73%             | 56.52%                         |
| Exact 95% CI for pCR Rate                                             | (10.70%, 35.66%)        | (15.87%, 46.98%)   | (41.11%, 71.07%)               |
| Binomial p-value: comparisons vs. trastuzumab                         | 0.3744                  |                    | 0.0147                         |
| Difference vs. trastuzumab and Exact 97.5% CI                         | -8.45% (-32.3%, 15.94%) |                    | 26.79% (1.90%, 49.06%)         |

# NeoALTTO Study Design

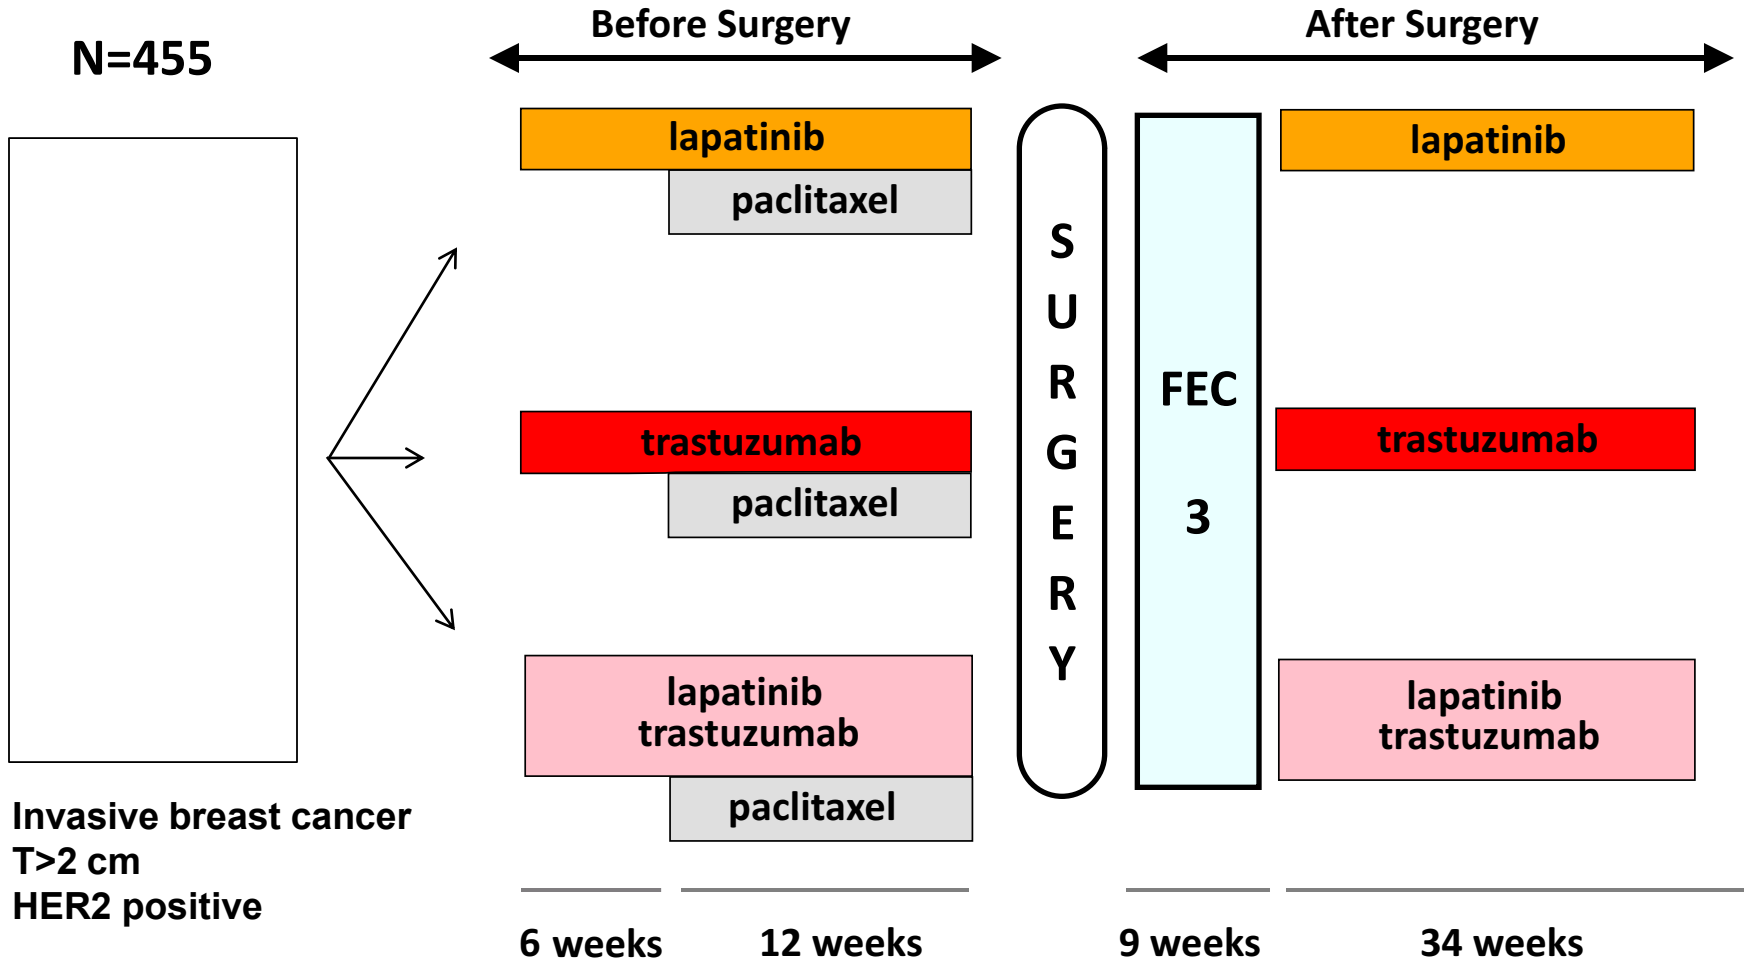

Supplement: NIHMS920034-supplement-Supplementary_Material.pdf [file NIHMS920034-supplement-Supplementary_Material.pdf]
